# Supplementary material for: Causal association between inflammatory bowel disease and hidradenitis suppurativa: A two-sample bidirectional Mendelian randomization study
Source: Front Immunol. 2023 Jan 26;14:1071616. doi: 10.3389/fimmu.2023.1071616 (PMC9909343; doi:10.3389/fimmu.2023.1071616)
Supplement: Supplementary file 2 [file Table_1.xlsx]

## Sheet: Supplementary Tables 1
Supplementary Table 1. Information of identified SNPs in exposure (IBD) and outcomes (HS).
SNP			Exposure （IBD)				Outcome (HS)				F statistics
RS ID	effect_allele	other_allele	beta	se	pval	eaf	beta	se	pval	eaf
rs1003342	G	A	-0.095001	0.0168	1.67101e-08	0.531334	-0.165537	0.0540342	0.00218726	0.47883	31.98
rs10045431	C	A	0.177406	0.0189	6.58567e-21	0.717524	0.0627513	0.0651434	0.335407	0.764241	88.1
rs10408351	A	G	0.137804	0.0221	4.23204e-10	0.238435	0.0877287	0.0711435	0.217529	0.183584	38.88
rs10737481	G	T	0.141103	0.017	1.18713e-16	0.554896	-0.0773198	0.0547054	0.157542	0.509707	68.89
rs10761659	G	A	0.161896	0.0172	4.07193e-21	0.554011	0.0238274	0.0547351	0.663329	0.528675	88.59
rs10800314	A	C	-0.143097	0.0179	1.17409e-15	0.649219	0.0368292	0.055852	0.509635	0.602071	63.9
rs11209026	A	G	-0.72629	0.0422	1.76319e-66	0.0541886	-0.310971	0.130189	0.0169126	0.0456686	296.19
rs11236797	A	C	0.155704	0.017	4.75007e-20	0.470011	0.0341727	0.0556753	0.539358	0.405434	83.88
rs112694524	A	G	0.188304	0.0303	5.39299e-10	0.0903752	-0.0201	0.153603	0.895888	0.0332635	38.62
rs113991740	A	T	-0.107697	0.0189	1.31999e-08	0.271565	-0.0343401	0.0581617	0.554905	0.330635	32.47
rs11548656	G	A	-0.292796	0.0507	7.71792e-09	0.034026	-0.106151	0.129685	0.413056	0.0475475	33.35
rs11677953	A	G	0.0975985	0.0171	1.053e-08	0.415063	0.0343474	0.0594781	0.563616	0.306565	32.57
rs12446550	A	G	0.107796	0.0171	2.78298e-10	0.409666	0.00713496	0.0547567	0.896327	0.478893	39.74
rs1250573	A	G	-0.113606	0.019	2.20902e-09	0.295706	-0.0772045	0.0567711	0.173853	0.365489	35.75
rs12764283	A	G	0.126597	0.0179	1.5729e-12	0.337409	0.113368	0.0565791	0.0451014	0.367711	50.02
rs12936409	T	C	0.145701	0.0168	3.86812e-18	0.476383	0.100877	0.0547862	0.0655798	0.514882	75.21
rs13178036	C	G	0.100904	0.0184	4.12895e-08	0.341807	0.0317922	0.0586784	0.587954	0.32814	30.07
rs140892874	C	T	0.409594	0.0512	1.2841e-15	0.027461	0.284546	0.169883	0.093942	0.0266359	63.99
rs142770866	A	G	0.23	0.0337	8.14329e-12	0.0810417	0.0577385	0.10083	0.566894	0.0803539	46.58
rs148844907	A	T	1.1375	0.0963	3.62577e-32	0.0103903	-0.338939	0.583536	0.56135	0.00252211	139.52
rs1736161	A	G	-0.123298	0.0174	1.3369e-12	0.428732	0.0149445	0.0559003	0.789205	0.399	50.21
rs17800987	G	A	0.2017	0.0305	3.70681e-11	0.089179	0.0140751	0.0895874	0.875158	0.103071	43.73
rs1873625	A	C	0.177301	0.0179	3.70681e-23	0.32287	-0.0218205	0.0554598	0.69399	0.424377	98.11
rs1886731	C	T	-0.0970995	0.0175	3.08397e-08	0.481193	-0.0424605	0.0549502	0.439694	0.488624	30.78
rs1887428	C	G	-0.171595	0.0178	6.64814e-22	0.61936	-0.0626496	0.05632	0.265973	0.614273	92.93
rs2076756	G	A	0.187595	0.0186	5.59114e-24	0.27064	-0.0506524	0.0761278	0.50582	0.152616	101.72
rs2193041	G	A	0.133703	0.0172	6.90876e-15	0.388781	0.082655	0.0582328	0.155785	0.32301	60.42
rs2241878	C	T	0.148001	0.0169	1.74502e-18	0.538498	0.0607999	0.0551524	0.270289	0.438778	76.69
rs2542147	T	G	-0.1513	0.0227	2.78484e-11	0.837193	-0.103967	0.0775676	0.180137	0.852709	44.42
rs254560	A	G	0.0995014	0.0171	6.159e-09	0.400063	0.0411989	0.0558011	0.460322	0.400303	33.86
rs2836882	A	G	-0.196295	0.0201	1.49005e-22	0.257617	-0.108105	0.0635687	0.0890164	0.247524	95.37
rs3024493	A	C	0.212996	0.0222	8.47618e-22	0.169666	-0.00669496	0.0753609	0.92921	0.155654	92.05
rs34190331	A	G	0.176899	0.0303	5.39399e-09	0.0853045	-0.158717	0.111751	0.155529	0.0640858	34.08
rs35260072	C	A	0.142197	0.017	7.06643e-17	0.433153	0.0443011	0.0588793	0.451807	0.316341	69.96
rs35730213	C	G	-0.151404	0.0194	6.90717e-15	0.262591	-0.180772	0.0684642	0.00828114	0.213403	60.9
rs4077515	T	C	0.179401	0.0172	1.50003e-25	0.424242	-0.0228052	0.0554797	0.681033	0.416415	108.78
rs4246905	C	T	0.163001	0.0197	1.41514e-16	0.729896	0.140859	0.0686355	0.040143	0.799506	68.46
rs444210	G	A	0.109502	0.0168	7.39095e-11	0.545781	0.0400536	0.0548039	0.464868	0.494604	42.48
rs4676408	A	G	0.118103	0.0181	6.61912e-11	0.515063	0.0381142	0.0572756	0.505762	0.633334	42.57
rs4712528	C	G	0.122598	0.0207	3.07397e-09	0.787692	0.00596569	0.0616735	0.922941	0.73284	35.08
rs4730272	G	A	-0.134102	0.0178	4.50194e-14	0.512591	-0.0109157	0.054663	0.841722	0.51957	56.76
rs4851586	C	T	-0.122403	0.0193	2.32498e-10	0.75745	-0.0670283	0.0696982	0.336203	0.808679	40.22
rs56062135	T	C	0.1509	0.0198	2.63998e-14	0.236922	-0.00368036	0.0620304	0.952688	0.262138	58.08
rs6062496	A	G	0.164997	0.018	5.47898e-20	0.578011	0.186173	0.0573331	0.00116536	0.644332	84.02
rs6584283	C	T	-0.180303	0.0169	1.70098e-26	0.510643	-0.00141472	0.0550068	0.979481	0.550007	113.82
rs6826501	T	C	-0.0927953	0.0169	4.12098e-08	0.536078	-0.114713	0.0565287	0.0424287	0.383527	30.15
rs6880778	G	A	0.187801	0.0173	2.14388e-27	0.620729	0.114711	0.0552584	0.0379036	0.568669	117.84
rs6911490	C	T	-0.142801	0.0208	6.82025e-12	0.778565	-0.0570013	0.067912	0.401278	0.790042	47.13
rs6927172	G	C	0.110295	0.0202	4.64505e-08	0.21432	0.00535899	0.0695752	0.938604	0.188965	29.81
rs72798422	C	T	0.2776	0.0431	1.18899e-10	0.041718	0.0965313	0.148219	0.514869	0.0346959	41.48
rs7285952	G	T	-0.176002	0.0235	7.60151e-14	0.157193	0.0443244	0.085974	0.606164	0.116994	56.09
rs744166	G	A	-0.120703	0.0172	2.15675e-12	0.409963	0.114541	0.0553653	0.038562	0.420041	49.24
rs7523335	A	G	-0.140504	0.0225	4.15796e-10	0.173424	-0.00190384	0.061644	0.975362	0.26599	38.99
rs9370774	C	T	-0.130704	0.0219	2.536e-09	0.20068	-0.0678124	0.0867141	0.434201	0.114354	35.62
rs9934775	T	C	-0.139595	0.0232	1.71498e-09	0.16068	-0.040582	0.0789245	0.607121	0.140804	36.2

## Sheet: Supplementary Tables 2
Supplementary Table 2. Information of identified SNPs in exposure (UC) and outcomes (HS).
SNP			Exposure （UC)				Outcome (HS)				F statistics
RS ID	effect_allele	other_allele	beta	se	pval	eaf	beta	se	pval	eaf
rs10182512	A	G	0.1608	0.0223	5.19398e-13	0.34989	0.107347	0.0573015	0.0610169	0.349744	51.99
rs10272963	T	C	-0.171904	0.0216	1.69083e-15	0.426078	0.0194441	0.0548902	0.723163	0.455009	63.33
rs10737481	G	T	0.250104	0.0216	4.36918e-31	0.556463	-0.0773198	0.0547054	0.157542	0.509707	134.06
rs10917545	A	G	-0.185101	0.0335	3.29397e-08	0.882174	0.0566594	0.0780158	0.467682	0.855427	30.53
rs11209026	A	G	-0.561698	0.0517	1.58016e-27	0.0589321	-0.310971	0.130189	0.0169126	0.0456686	118.03
rs114152040	A	G	0.339603	0.0623	4.94903e-08	0.0317179	0.115396	0.149595	0.440476	0.0349761	29.71
rs12612675	G	A	0.122902	0.0219	1.97702e-08	0.402826	0.0264896	0.059334	0.655273	0.308707	31.49
rs12817473	G	A	0.190701	0.0217	1.70883e-18	0.382176	0.0825161	0.0582774	0.156799	0.32275	77.23
rs1359946	A	G	0.158302	0.0269	3.83796e-09	0.196096	0.120951	0.0719545	0.0927748	0.176029	34.63
rs137845	G	A	0.118198	0.0212	2.37602e-08	0.514874	-0.0258954	0.0552866	0.639508	0.5698	31.08
rs148844907	A	T	1.3413	0.1089	7.17464e-35	0.010151	-0.338939	0.583536	0.56135	0.00252211	151.69
rs1801274	G	A	-0.182896	0.0217	3.77833e-17	0.483094	0.0479536	0.0545879	0.379691	0.503569	71.03
rs1886731	C	T	-0.140501	0.0221	2.25398e-10	0.480618	-0.0424605	0.0549502	0.439694	0.488624	40.42
rs1887428	C	G	-0.176701	0.0224	3.35506e-15	0.622856	-0.0626496	0.05632	0.265973	0.614273	62.22
rs2212434	T	C	0.141899	0.0213	2.4632e-11	0.459604	0.0403276	0.0557247	0.469254	0.40497	44.38
rs254559	A	C	0.124304	0.0215	7.62799e-09	0.404112	0.041113	0.0558693	0.461804	0.399585	33.42
rs3024493	A	C	0.236297	0.0276	1.09194e-17	0.168128	-0.00669496	0.0753609	0.92921	0.155654	73.29
rs35730213	C	G	-0.167	0.0245	8.81455e-12	0.266634	-0.180772	0.0684642	0.00828114	0.213403	46.46
rs3829111	A	G	0.156303	0.0214	2.89401e-13	0.416668	-0.00787532	0.0555186	0.887199	0.417038	53.34
rs4574921	T	C	0.150599	0.0256	4.23897e-09	0.740842	0.136659	0.0697389	0.0500449	0.807521	34.61
rs4676410	A	G	0.207802	0.0284	2.45923e-13	0.197128	0.156459	0.0619598	0.0115641	0.27088	53.53
rs483905	A	G	0.128903	0.0228	1.57199e-08	0.294334	0.149003	0.0663846	0.0247976	0.214983	31.96
rs484356	G	C	-0.134199	0.0228	3.95003e-09	0.32765	-0.0375511	0.0561044	0.503299	0.392399	34.64
rs56167332	A	C	0.151596	0.0231	5.29907e-11	0.34162	0.0267124	0.0595573	0.653781	0.306039	43.07
rs6017342	C	A	0.191306	0.024	1.38484e-15	0.537652	-0.0135339	0.055349	0.806828	0.558248	63.53
rs6062496	A	G	0.158498	0.0224	1.46791e-12	0.572636	0.186173	0.0573331	0.00116536	0.644332	50.06
rs6933404	C	T	0.166799	0.0252	3.68468e-11	0.21562	-0.00101025	0.0696069	0.98842	0.189178	43.81
rs7523335	A	G	-0.170397	0.0285	2.28802e-09	0.176698	-0.00190384	0.061644	0.975362	0.26599	35.74
rs7752873	T	C	0.182297	0.0303	1.83299e-09	0.13681	0.173649	0.0882826	0.049187	0.108601	36.2
rs7911680	C	A	-0.1718	0.0213	8.26609e-16	0.490094	-0.015137	0.0546964	0.781975	0.530449	65.05
rs798502	C	A	-0.136496	0.0239	1.213e-08	0.283142	-0.0310558	0.057194	0.587136	0.351343	32.62
rs9823546	A	T	0.176899	0.0223	2.28613e-15	0.310414	-0.0281278	0.0556728	0.613395	0.412213	62.92
rs989960	T	C	-0.129096	0.0215	1.766e-09	0.424904	-0.019545	0.0546948	0.720832	0.508413	36.05
rs9977672	A	G	-0.245006	0.0261	6.20583e-21	0.251316	-0.0825055	0.0648602	0.203356	0.236475	88.11

## Sheet: Supplementary Tables 3
Supplementary Table 3. Information of identified SNPs in exposure (CD) and outcomes (HS).
SNP			Exposure （CD)				Outcome (HS)				F statistics
RS ID	effect_allele	other_allele	beta	se	pval	eaf	beta	se	pval	eaf
rs1056441	C	T	0.167	0.0255	5.44127e-11	0.697697	0.146976	0.0626617	0.018999	0.743988	42.89
rs10761659	G	A	0.212006	0.0237	3.41979e-19	0.55269	0.0238274	0.0547351	0.663329	0.528675	80.02
rs11209026	A	G	-0.995199	0.0639	1.05196e-54	0.0563213	-0.310971	0.130189	0.0169126	0.0456686	242.55
rs11236797	A	C	0.181104	0.0231	4.854e-15	0.473264	0.0341727	0.0556753	0.539358	0.405434	61.46
rs114607072	T	G	0.441797	0.0629	2.19685e-12	0.0402795	-0.191946	0.242016	0.427712	0.0131555	49.33
rs11564236	T	A	0.519093	0.0595	2.84512e-18	0.034419	0.284568	0.169887	0.0939247	0.0266358	76.11
rs12194825	A	T	-0.171904	0.0298	8e-09	0.18587	-0.0103943	0.0653659	0.873655	0.225486	33.27
rs1250573	A	G	-0.170895	0.0264	9.00534e-11	0.287447	-0.0772045	0.0567711	0.173853	0.365489	41.9
rs12717899	T	G	0.159198	0.0289	3.59402e-08	0.793845	-0.171246	0.0738619	0.0204244	0.835462	30.34
rs1297271	T	C	-0.154901	0.0237	6.27769e-11	0.429877	0.0148647	0.0559247	0.790395	0.399364	42.72
rs13135092	G	A	0.221495	0.0389	1.21001e-08	0.095419	0.132552	0.211728	0.531284	0.0176033	32.42
rs1332099	C	T	-0.211597	0.0231	4.35712e-20	0.515025	-0.0353351	0.0548429	0.519383	0.539988	83.9
rs140054334	T	C	0.349797	0.0628	2.56602e-08	0.038307	-0.175925	0.455991	0.699639	0.00360194	31.02
rs1456896	T	C	0.139301	0.0251	2.89701e-08	0.697556	0.118322	0.0603277	0.0498414	0.711821	30.8
rs147018773	T	C	0.321699	0.0375	8.88792e-18	0.0966978	-0.00866227	0.097809	0.929429	0.0845912	73.59
rs148844907	A	T	0.958001	0.1419	1.47096e-11	0.00828273	-0.338939	0.583536	0.56135	0.00252211	45.58
rs151314883	A	G	-0.223994	0.0327	7.12361e-12	0.157585	0.0439465	0.085984	0.60928	0.116996	46.92
rs1873625	A	C	0.180704	0.0243	1.09396e-13	0.320264	-0.0218205	0.0554598	0.69399	0.424377	55.3
rs1887428	C	G	-0.168099	0.0243	4.22377e-12	0.623303	-0.0626496	0.05632	0.265973	0.614273	47.85
rs1932990	T	C	0.152901	0.0263	6.02102e-09	0.253841	-0.0158912	0.0681044	0.8155	0.201202	33.8
rs2076756	G	A	0.399806	0.0242	3.24489e-61	0.283672	-0.0506524	0.0761278	0.50582	0.152616	272.92
rs2129944	G	T	-0.1562	0.0271	7.80998e-09	0.291299	0.0232308	0.0640028	0.71663	0.26825	33.22
rs2188962	T	C	0.212398	0.0228	1.35988e-20	0.439546	0.0459205	0.0587698	0.434589	0.318279	86.78
rs2505640	G	A	-0.145701	0.0237	7.61202e-10	0.643588	-0.118696	0.0564378	0.0354536	0.62744	37.79
rs281379	A	G	0.139797	0.0238	4.26403e-09	0.489275	0.00801147	0.0556617	0.885555	0.408696	34.5
rs28701841	A	G	0.224303	0.0373	1.85102e-09	0.116563	0.0628565	0.096826	0.51623	0.0863462	36.16
rs3024505	A	G	0.177903	0.0302	3.90499e-09	0.16156	5.28555e-06	0.0750811	0.999944	0.156913	34.7
rs3091315	G	A	-0.179501	0.0263	9.52138e-12	0.265588	-0.0355577	0.0578425	0.53873	0.335209	46.58
rs3810936	C	T	0.207799	0.0263	2.46207e-15	0.698408	0.0666208	0.065054	0.305795	0.767257	62.42
rs4077515	T	C	0.215901	0.0235	4.37019e-20	0.419834	-0.0228052	0.0554797	0.681033	0.416415	84.4
rs444210	G	A	0.163402	0.0229	1.02494e-12	0.546838	0.0400536	0.0548039	0.464868	0.494604	50.91
rs4851586	C	T	-0.168899	0.0261	9.93574e-11	0.759729	-0.0670283	0.0696982	0.336203	0.808679	41.87
rs4902642	A	G	-0.129198	0.0236	4.339e-08	0.409159	0.0299213	0.0550686	0.586892	0.514536	29.97
rs4921497	G	C	0.160298	0.0244	5.49414e-11	0.329415	0.0817911	0.0592882	0.167724	0.311207	43.16
rs56062135	T	C	0.193097	0.0269	7.45247e-13	0.234271	-0.00368036	0.0620304	0.952688	0.262138	51.53
rs6588243	C	A	0.131704	0.0234	1.77701e-08	0.589982	-0.0881076	0.0548186	0.107998	0.508934	31.68
rs6704109	T	C	0.202002	0.0256	2.77013e-15	0.256123	0.120653	0.0606601	0.0467014	0.282408	62.26
rs697693	A	G	0.172296	0.0281	8.35507e-10	0.201415	-0.0210077	0.0920197	0.819416	0.0993018	37.59
rs72798422	C	T	0.590392	0.0508	3.19301e-31	0.047701	0.0965313	0.148219	0.514869	0.0346959	135.06
rs744166	G	A	-0.129299	0.0233	2.92301e-08	0.408159	0.114541	0.0553653	0.038562	0.420041	30.79
rs7543234	T	C	0.155498	0.0267	6.09804e-09	0.238986	0.0127596	0.0598688	0.831229	0.299433	33.92
rs7713270	T	C	0.296602	0.0241	6.96627e-35	0.623824	0.104307	0.0552967	0.059253	0.56884	151.46
rs78487399	C	G	0.2259	0.037	1.031e-09	0.100704	-0.00362849	0.120382	0.975954	0.0550513	37.27
rs80262450	A	G	0.283102	0.0353	1.08193e-15	0.112701	0.0590916	0.0845665	0.484702	0.120644	64.31
rs8137950	C	T	0.173996	0.0286	1.167e-09	0.199556	0.0529733	0.0590543	0.369705	0.315836	37.01
rs8178977	C	G	0.1928	0.0274	2.05589e-12	0.238841	0.0446983	0.0628493	0.476961	0.258221	49.51
rs907092	A	G	0.130396	0.0228	1.011e-08	0.471412	0.105624	0.0548999	0.0543613	0.526662	32.71
rs921720	G	A	0.162895	0.0237	6.39588e-12	0.618841	0.013257	0.0611614	0.828399	0.722573	47.24

## Sheet: Supplementary Table 4
Supplementary Table 4. Information of identified SNPs in exposure (HS) and outcomes (IBD, UC and CD).
SNP			Exposure (HS)				Outcome (IBD)				Outcome (UC)				Outcome （CD)				F statistics
RS ID	effect_allele	other_allele	beta	se	pval	eaf	beta	se	pval	eaf	beta	se	pval	eaf	beta	se	pval	eaf
rs115911339	C	T	-0.548678	0.118465	3.62903e-06	0.0747827	0.050704	0.0444	0.2531	0.049372	0.0163022	0.0555	0.7685	0.050254	0.0332983	0.0617	0.589599	0.049	21.45
rs12024307	A	G	-0.311455	0.065172	1.76202e-06	0.816687	0.0444952	0.0201	0.0264899	0.727089	0.0505981	0.0254	0.0464398	0.725556	0.0127978	0.0272	0.637699	0.726711	22.84
rs146312071	C	T	1.4569	0.315991	4.01569e-06	0.00311646	-0.00179838	0.1144	0.9872	0.010372	-0.0744022	0.1529	0.6264	0.009746	0.0509986	0.1386	0.713001	0.012	21.26
rs162331	T	C	0.270633	0.0549343	8.37259e-07	0.56683	0.0188021	0.0167	0.2593	0.519859	0.0160997	0.021	0.4427	0.518016	0.0205964	0.0227	0.366	0.521856	24.27
rs17090189	G	A	-0.446419	0.0878274	3.71698e-07	0.132201	0.0536012	0.0225	0.0170699	0.163602	0.0610034	0.0282	0.0305197	0.163032	0.0226956	0.0307	0.459501	0.164141	25.84
rs17825750	A	G	0.451921	0.0864834	1.73668e-07	0.0796551	0.0555009	0.027	0.0397704	0.105859	0.0443996	0.0342	0.1945	0.104016	0.0619038	0.0363	0.0882999	0.106711	27.31
rs2112903	C	G	0.336651	0.0728675	3.83663e-06	0.13303	-0.0121029	0.0242	0.6181	0.139256	-0.033805	0.0305	0.2677	0.138984	0.0226026	0.033	0.4929	0.13857	21.34
rs227813	A	G	0.265276	0.0542757	1.02087e-06	0.386008	0.00649884	0.0169	0.6999	0.448372	-0.002002	0.0214	0.9258	0.446238	0.00400198	0.023	0.8637	0.452141	23.89
rs4858420	T	C	0.253766	0.0553946	4.62626e-06	0.58853	0.0141987	0.0171	0.4056	0.594744	-0.00260339	0.0215	0.9047	0.593254	0.0199007	0.0235	0.3969	0.594856	20.99
rs7177278	C	G	0.272443	0.0590291	3.92338e-06	0.25243	-0.00369682	0.0197	0.849	0.256372	-0.00060018	0.0248	0.9804	0.256254	-0.00150113	0.0268	0.9555	0.257285	21.3
rs7212346	G	C	-0.319395	0.0560751	1.22764e-08	0.388269	-0.0010994	0.0187	0.9514	0.320628	0.00439966	0.0234	0.8502	0.321508	0.00160128	0.0257	0.9514	0.319144	32.44
rs7321613	A	G	0.47152	0.0968011	1.11025e-06	0.0617656	0.0140015	0.0335	0.677001	0.0708063	0.0140015	0.0426	0.7417	0.0695	0.0363994	0.0448	0.4167	0.0728556	23.73
rs77175710	G	A	-0.402821	0.081622	8.00663e-07	0.153718	-0.018704	0.025	0.4548	0.143885	-0.0247024	0.0317	0.4352	0.143984	0.0208968	0.034	0.5373	0.144285	24.36
rs895790	T	C	0.305766	0.0628966	1.16552e-06	0.205004	0.0379025	0.0197	0.0543501	0.245487	0.0456041	0.0248	0.0653793	0.246524	0.0310044	0.027	0.2494	0.241856	23.63
